# Supplementary material for: Composition–structure–luminescence and enhancement of Cr3+ activated broadband near infrared phosphors for night vision, bio-imaging, and noninvasive detection
Source: Royal Society of Chemistry journal article supplement (doi:10.1039/d3tc03186a), 2023-01-01
Supplement: d3tc03186a1.pdf [file d3tc03186a1.pdf]

Composition-structure-luminescence and enhancement of Cr<sup>3+</sup>  
activated broadband near infrared phosphors for night vision, bio-  
imaging, and noninvasive detection

Gui-Hua Li<sup>a,b</sup>, Jun-Ben Huang<sup>a,b</sup>, Qi-Hua Yang<sup>a,b</sup>, Jin Wang<sup>a,b</sup>, Ge-Mei Cai<sup>a,b\*</sup>,  
Xiao-Jun Wang<sup>c,\*</sup>

*<sup>a</sup>School of Materials Science and Engineering, Education Ministry Key Laboratory of Non-ferrous Materials Science and Engineering, Central South University, Changsha, 410083, P.R. China*

*<sup>b</sup>Science Center for Phase Diagram & Materials Design and Manufacture, Central South University, Changsha 410083, Hunan, P. R. China*

*<sup>c</sup>Department of Physics, Georgia Southern University, Statesboro, GA 30460, USA.*

**Table S1.** Crystallographic data, structure refinement parameters of KSP0: 0.03Cr<sup>3+</sup>.

|                          |                                                                      |
|--------------------------|----------------------------------------------------------------------|
| Formula                  | KSc <sub>0.97</sub> Cr <sub>0.03</sub> P <sub>2</sub> O <sub>7</sub> |
| Radiation type           | Cu K $\alpha$                                                        |
| 2 $\theta$ range (°)     | 5-130                                                                |
| Step (°)                 | 0.01                                                                 |
| R <sub>B</sub> (%)       | 2.59                                                                 |
| R <sub>P</sub> (%)       | 2.88                                                                 |
| R <sub>WP</sub> (%)      | 4.04                                                                 |
| S (%)                    | 1.67                                                                 |
| Crystal system           | Monoclinic                                                           |
| Space group              | <i>P</i> 2 <sub>1</sub> / <i>c</i> (No. 14)                          |
| a (Å)                    | 7.4535(1)                                                            |
| b (Å)                    | 10.3481(2)                                                           |
| c (Å)                    | 8.3557(1)                                                            |
| $\beta$                  | 106.4860(9)                                                          |
| Volume (Å <sup>3</sup> ) | 617.98(1)                                                            |
| Z                        | 4                                                                    |

\* The corresponding author. E-mail address: caigemei@csu.edu.cn (G. M. Cai);  
xwang@georgiasouthern.edu (X.J. Wang).

**Table S2.** Atomic parameters of KSPO: 0.03Cr<sup>3+</sup>.

| Atom | Wyck. | Occ. | x/a       | y/b       | z/c       | U [Å <sup>2</sup> ] |
|------|-------|------|-----------|-----------|-----------|---------------------|
| K1   | 4e    | 1    | 0.8193(3) | 0.6794(1) | 0.9410(2) | 0.0000              |
| Sc1  | 4e    | 0.97 | 0.7643(2) | 0.0993(1) | 0.7430(2) | 0.0000              |
| Cr1  | 4e    | 0.03 | 0.7643(2) | 0.0993(2) | 0.7430(2) | 0.0000              |
| P1   | 4e    | 1    | 0.5593(3) | 0.3595(3) | 0.8108(3) | 0.0000              |
| P2   | 4e    | 1    | 0.8654(3) | 0.4011(2) | 0.6773(3) | 0.0000              |
| O1   | 4e    | 1    | 0.5534(6) | 0.2209(5) | 0.7662(5) | 0.0000              |
| O2   | 4e    | 1    | 0.3650(6) | 0.4228(5) | 0.7617(6) | 0.0000              |
| O3   | 4e    | 1    | 0.6752(6) | 0.3912(5) | 0.9854(5) | 0.0000              |
| O4   | 4e    | 1    | 0.6595(6) | 0.4350(4) | 0.6932(5) | 0.0000              |
| O5   | 4e    | 1    | 0.9897(6) | 0.5053(5) | 0.7745(5) | 0.0000              |
| O6   | 4e    | 1    | 0.8600(7) | 0.4090(5) | 0.4981(6) | 0.0000              |
| O7   | 4e    | 1    | 0.9228(6) | 0.2652(5) | 0.7506(6) | 0.0000              |

**Table S3.** Bond length of KSPO: 0.03Cr<sup>3+</sup>.

| Atom1   | Atom2          | Symmetry operator  | Bond length (Å) |
|---------|----------------|--------------------|-----------------|
| K1      | O5             | x, y, z            | 2.792(5)        |
|         | O7             | 2-x, 1-y, 2-z      | 2.802(4)        |
|         | O1             | 1-x, 0.5+y, 1.5-z  | 2.858(4)        |
|         | O7             | 2-x, 0.5+y, 1.5-z  | 2.965(5)        |
|         | O5             | 2-x, 1-y, 2-z      | 3.068(4)        |
|         | O2             | 1-x, 0.5+y, 1.5-z  | 3.127(5)        |
|         | O3             | x, y, z            | 3.227(5)        |
|         |                | Average length     | 2.935           |
| Sc1 Cr1 | O6             | x, 0.5-y, 0.5+z    | 2.049(5)        |
|         | O2             | 1-x, -0.5+y, 1.5-z | 2.060(5)        |
|         | O1             | x, y, z            | 2.065(5)        |
|         | O3             | x, 0.5-y, -0.5+z   | 2.067(4)        |
|         | O7             | x, y, z            | 2.075(5)        |
|         | O5             | 2-x, -0.5+y, 1.5-z | 2.117(5)        |
|         |                | Average length     | 2.072           |
| P1      | O1             | x, y, z            | 1.479(6)        |
|         | O3             | x, y, z            | 1.506(4)        |
|         | O2             | x, y, z            | 1.535(5)        |
|         | O4             | x, y, z            | 1.597(5)        |
|         | Average length | 1.529              |                 |
| P2      | O6             | x, y, z            | 1.489(5)        |
|         | O5             | x, y, z            | 1.501(5)        |
|         | O7             | x, y, z            | 1.545(5)        |
|         | O4             | x, y, z            | 1.616(5)        |
|         | Average length | 1.538              |                 |

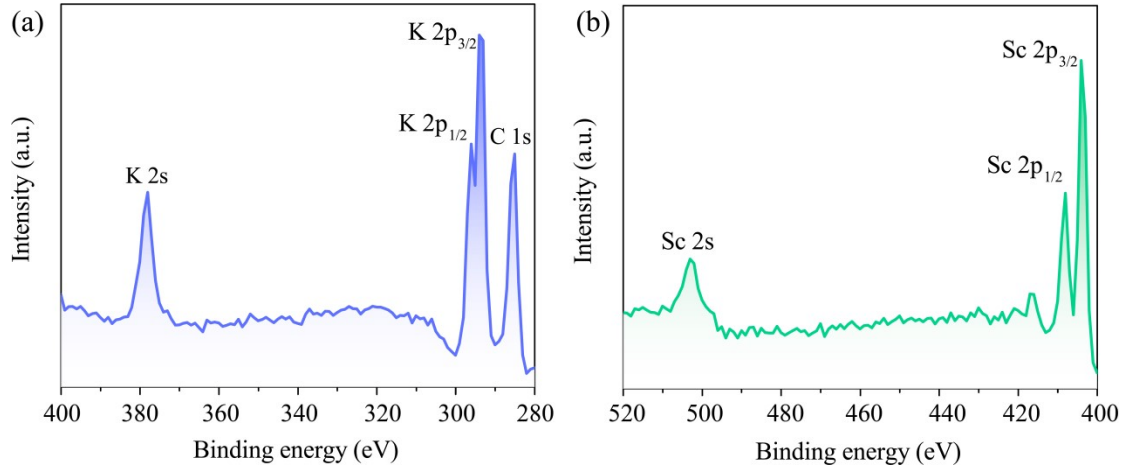

**Fig. S1** The binding energy peaks splitting results of K (a) and Sc (b). The peaks at 293.4, 296.1, and 377.8 eV are attributed to the K 2p<sub>3/2</sub>, K 2p<sub>1/2</sub>, and K 2s. And the peaks at 404.5, 408.3, and 502.7 eV can be assigned to the Sc 2p<sub>3/2</sub>, Sc 2p<sub>1/2</sub>, and Sc 2s.

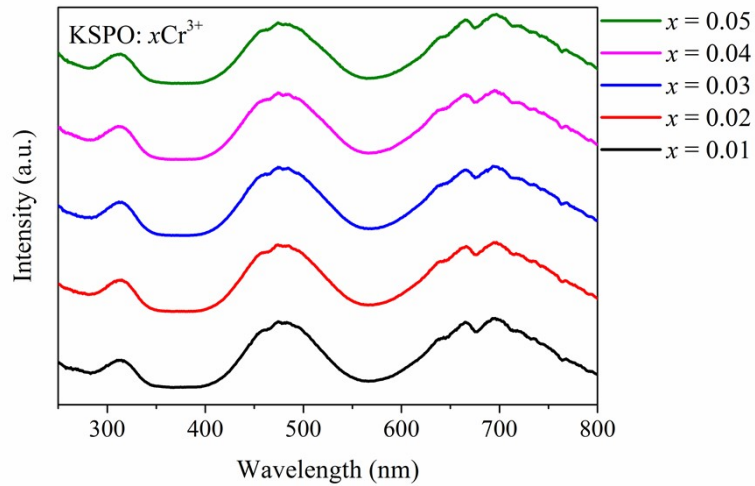

**Fig. S2** PLE spectra of KSPO: xCr<sup>3+</sup> phosphors monitored at 873 nm.

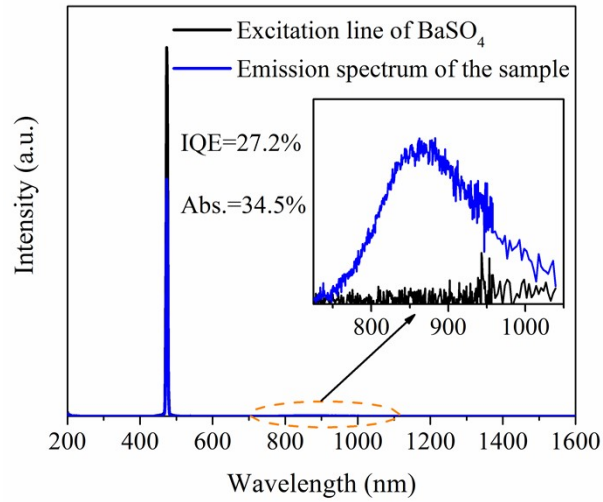

**Fig. S3** PL spectra with BaSO<sub>4</sub> as the reference under 475 nm excitation for quantum efficiency measurements of KSPO: 0.03Cr<sup>3+</sup>.

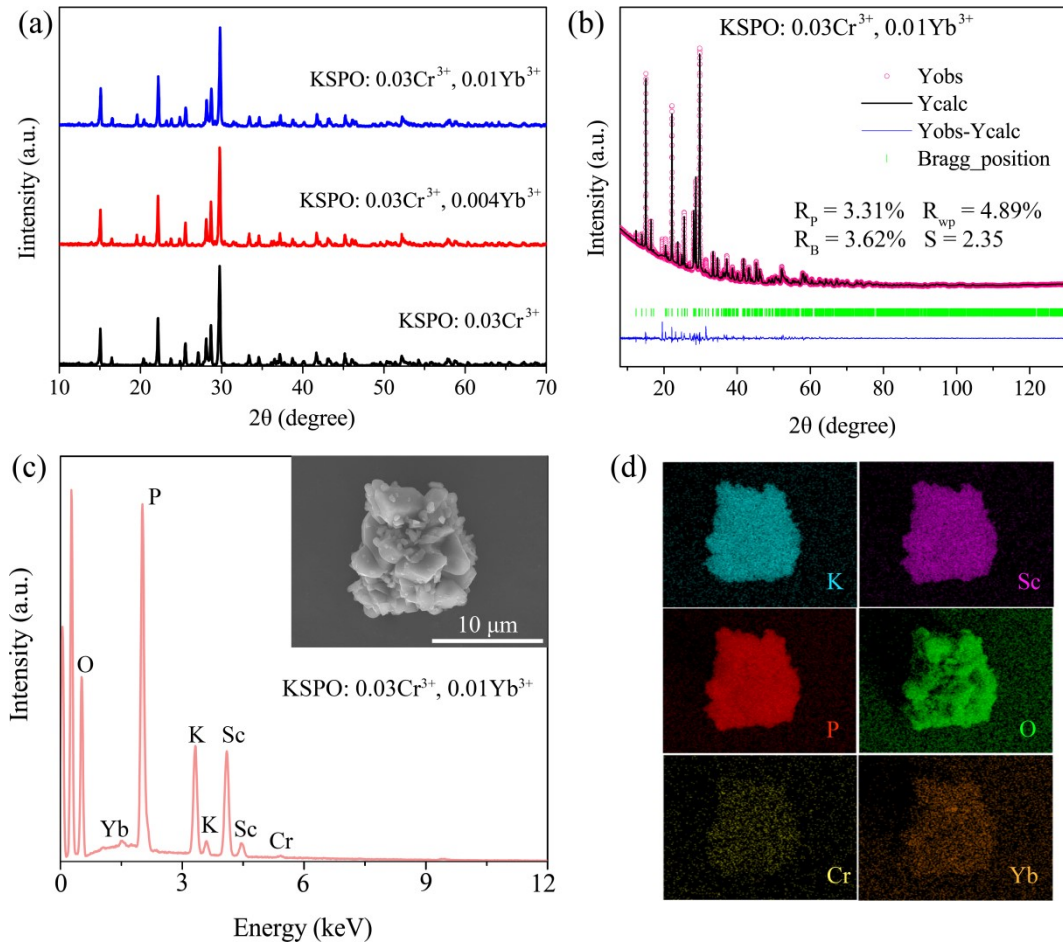

**Fig. S4** XRD pattern of KSPO: 0.03Cr<sup>3+</sup>, yYb<sup>3+</sup> samples. (b) The refinement result of KSPO: 0.03Cr<sup>3+</sup>, 0.01Yb<sup>3+</sup>. The EDS (c) and SEM mapping (d) of KSPO: 0.03Cr<sup>3+</sup>, 0.01Yb<sup>3+</sup>.

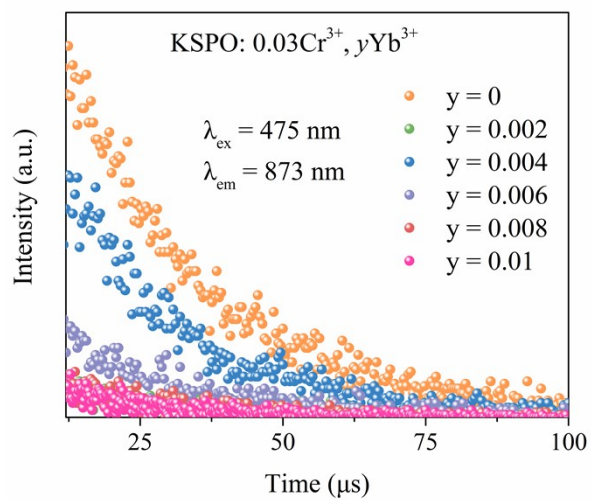

**Fig. S5** The decay curves of Cr<sup>3+</sup> emission in KSPO: 0.03Cr<sup>3+</sup>, yYb<sup>3+</sup> samples.
